# Supplementary material for: Nicotinic acid-based cationic vectors for efficient gene delivery to glioblastoma cells
Source: Royal Society of Chemistry journal article supplement (doi:10.1039/d2nj03207d), 2022-01-01
Supplement: d2nj03207d1.pdf [file d2nj03207d1.pdf]

**Electronic Supplementary Information (ESI) for New Journal of Chemistry**

**Nicotinic Acid-Based Cationic Vectors for Efficient Gene Delivery in to  
Glioblastoma Cells**

Shireesha Manturthi <sup>a</sup>, Dwaipayan Bhattacharya <sup>b</sup>, Kalyani Rajesh Sakhare <sup>b</sup>, Kumar Pranav  
Narayan <sup>b\*</sup>, Srilakshmi V. Patri <sup>a\*</sup>

<sup>a</sup>*Department of Chemistry, National Institute of Technology Warangal, Hanamkonda,  
Telangana-506004, India*

<sup>b</sup>*Department of Biological Science, Bits pilani-hyderabad, Hyderabad, Telangana-500078, India*

Correspondence to

\*- [patrisrilaksmi@nitw.ac.in](mailto:patrisrilaksmi@nitw.ac.in)

\*- [pranav@hyderabad.bits-pilani.ac.in](mailto:pranav@hyderabad.bits-pilani.ac.in)

**Supplementary information**

**Table of Contents:**

- 1) <sup>1</sup>H-NMR, <sup>13</sup>C-NMR and ESI-MS (HRMS) spectra of cationic lipids including the intermediates..... (Fig. S1-S21)
- 2) HPLC chromatogram of NGT and NGC lipids..... (Fig. S22 and S23)
- 3) FACS analysis of eGFP transfection of NGT and NGC at 2:1 mole ratio in HEK-293, U87, CAL-27, and CT-26 cell lines..... (Fig. S24)

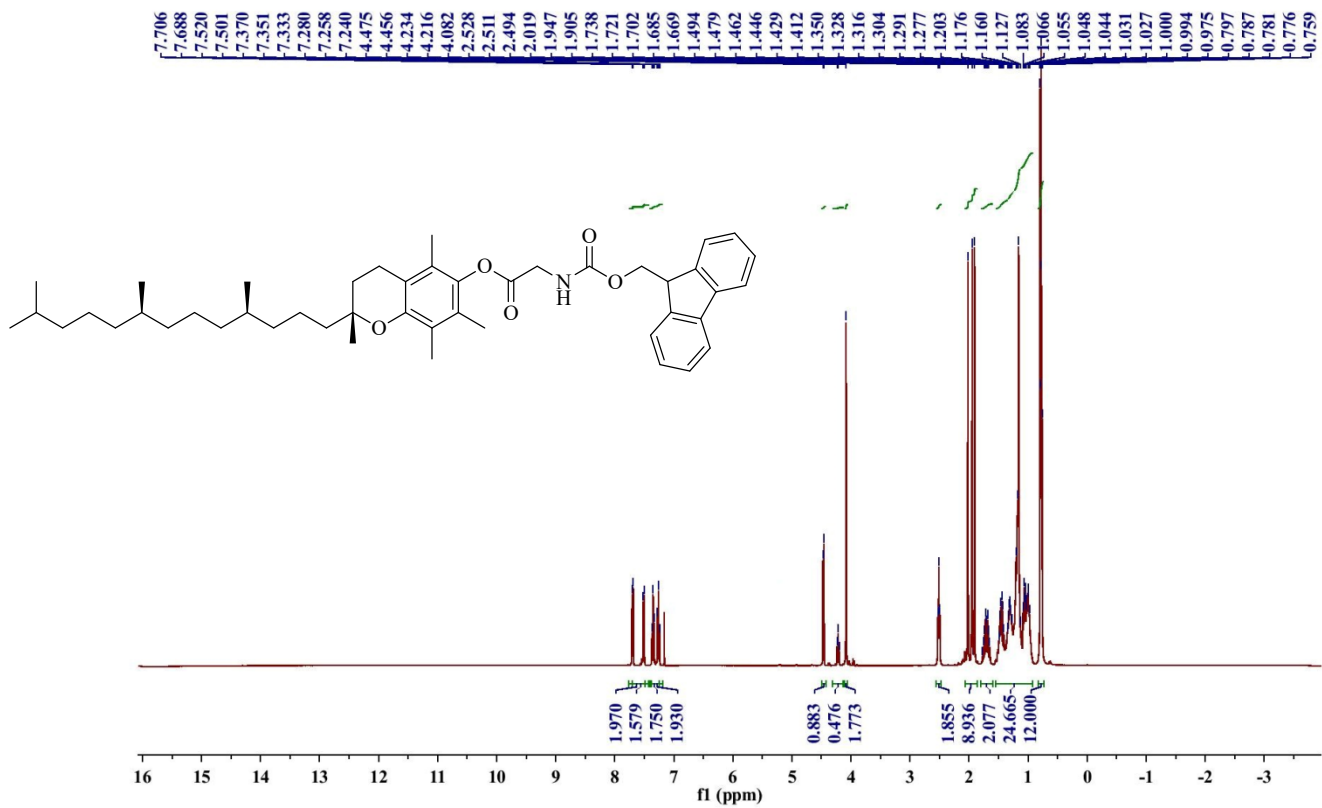

Figure S1: <sup>1</sup>H NMR Spectrum of intermediate 1A, Scheme A

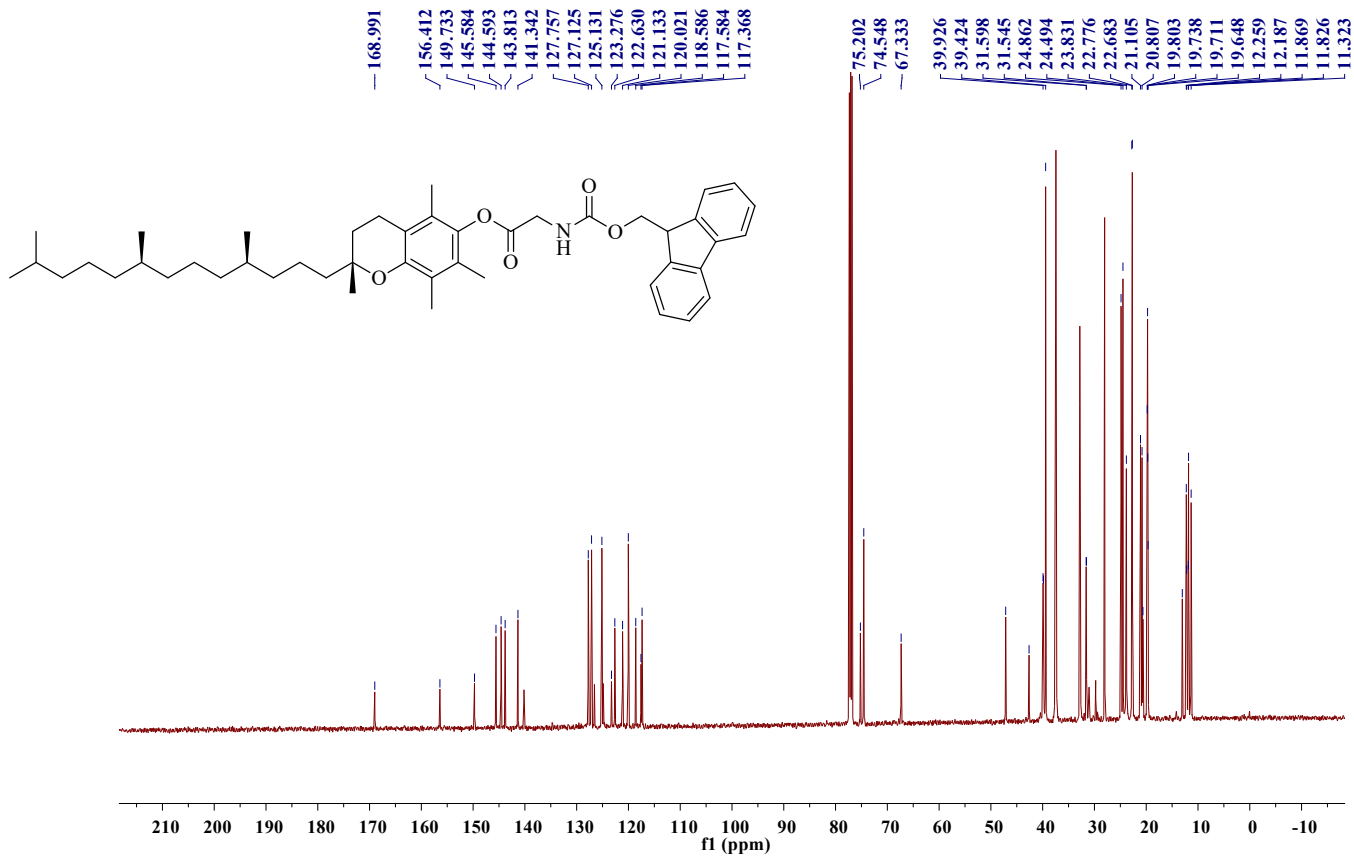

Figure S2: <sup>13</sup>C NMR Spectrum of intermediate 1A, Scheme A

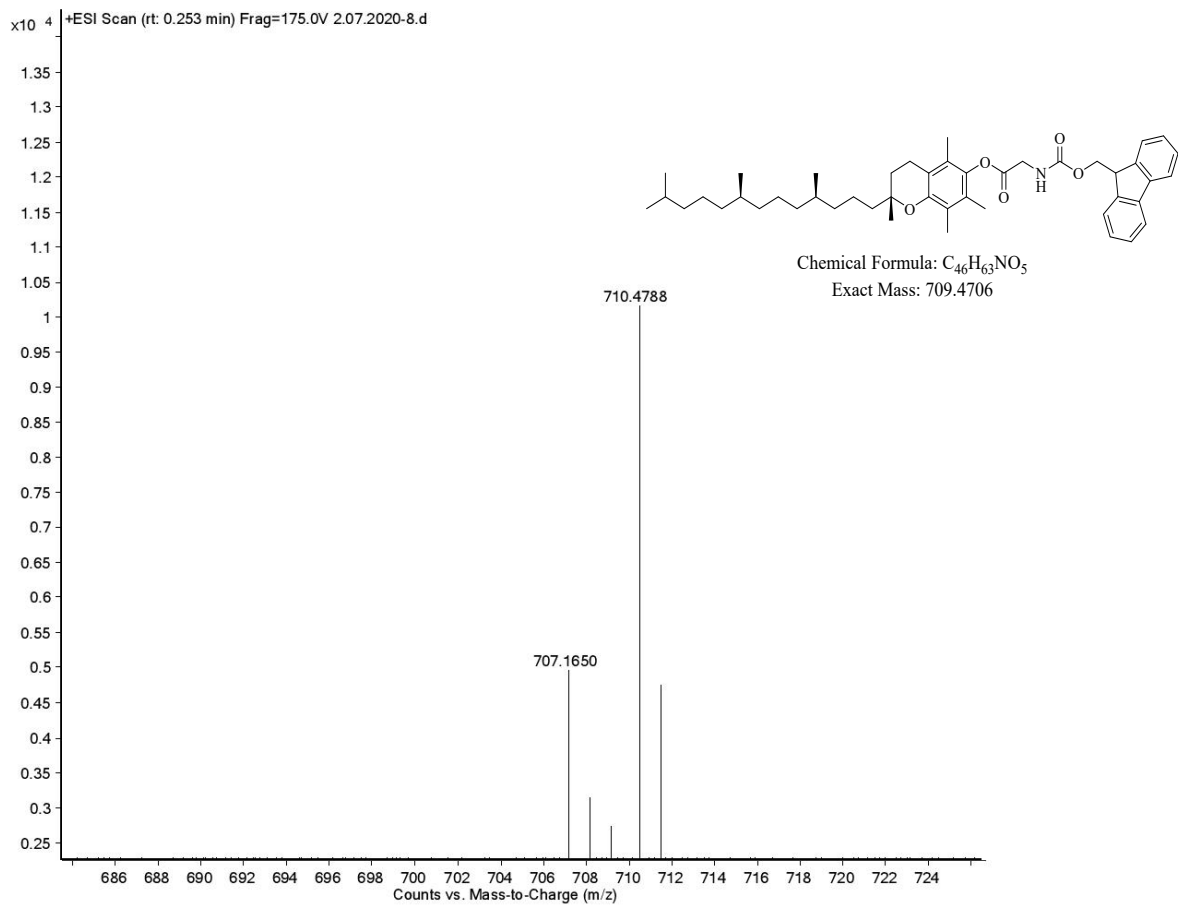

**Figure S3:** ESI-HRMS Spectrum of intermediate **1A**, Scheme A

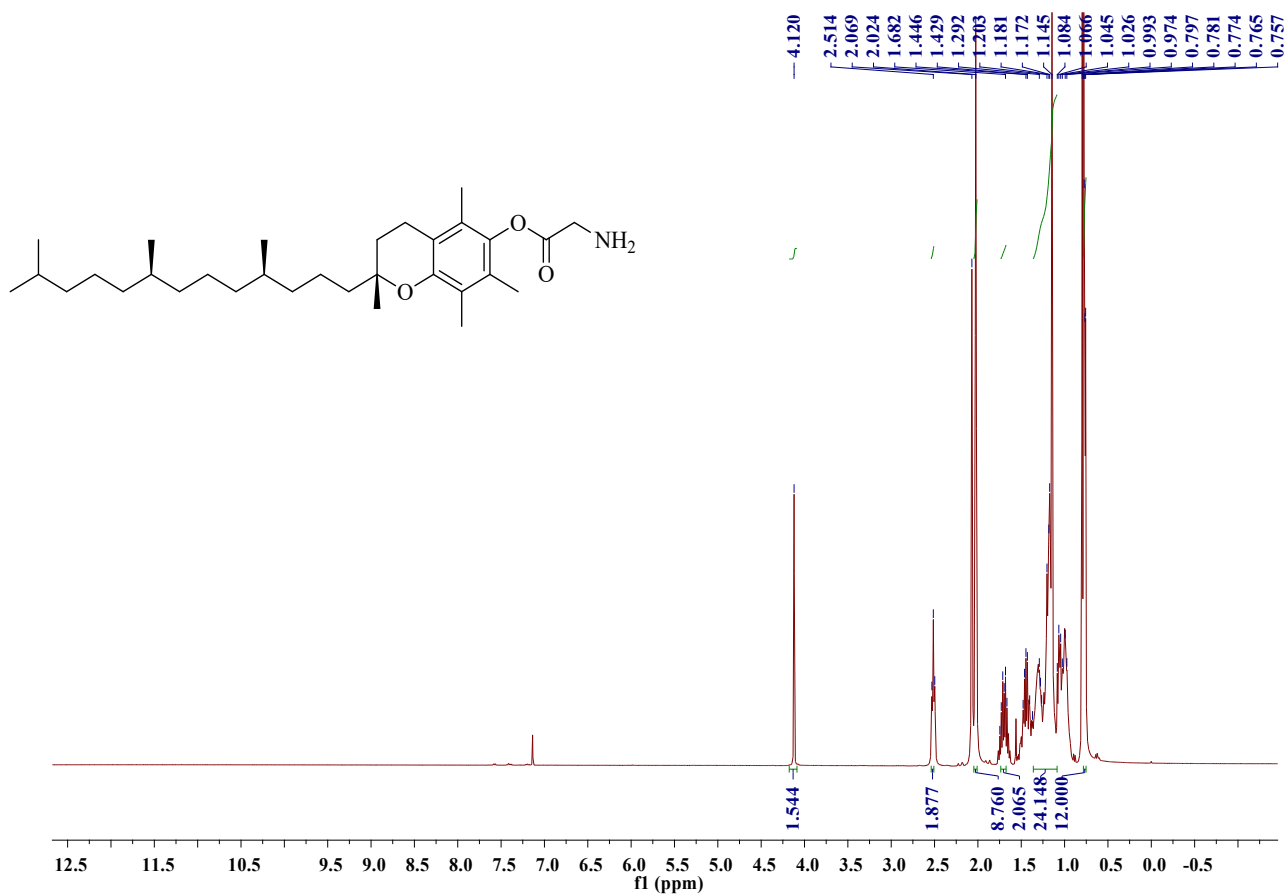

**Figure S4:** <sup>1</sup>H NMR Spectrum of intermediate 2A, Scheme A

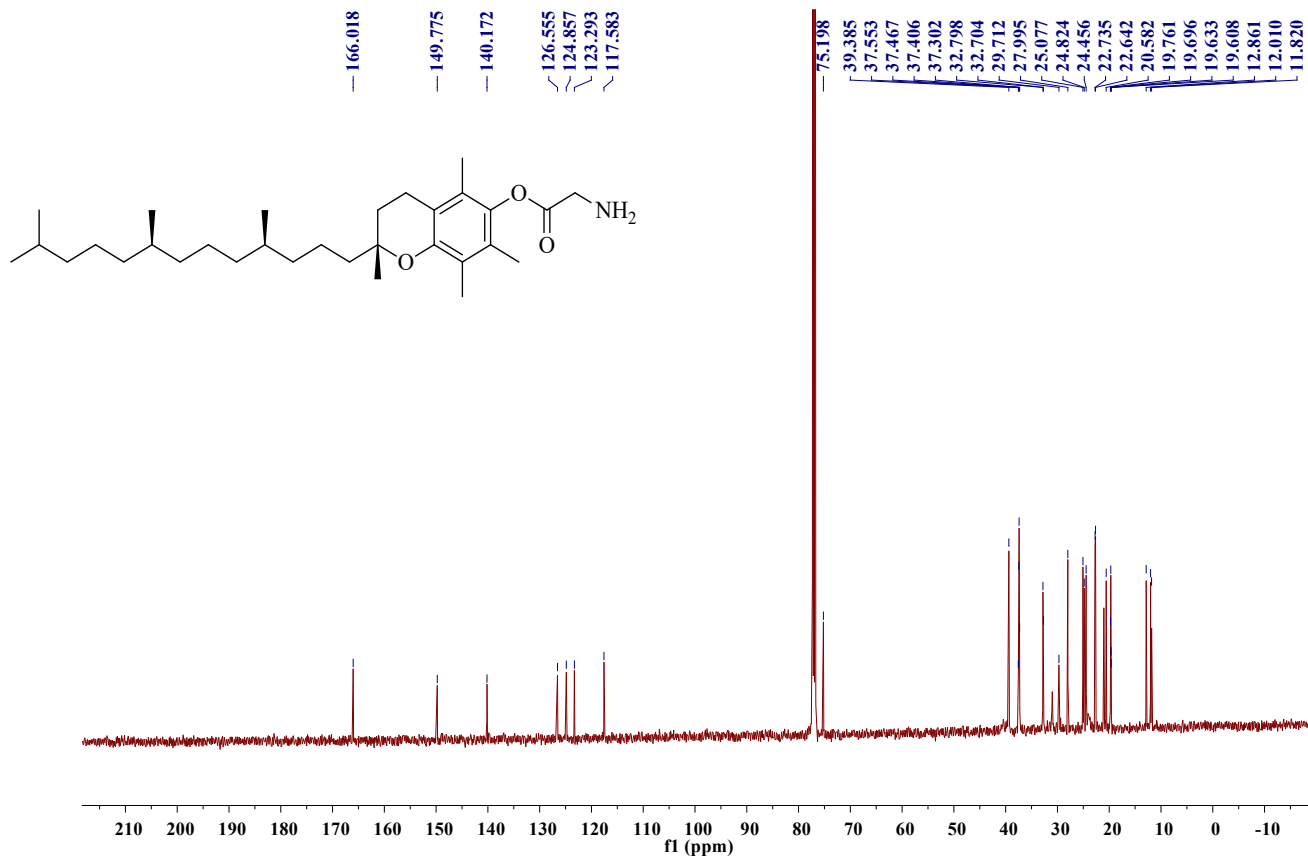

Figure S5: <sup>13</sup>C NMR Spectrum of intermediate 2A, Scheme A

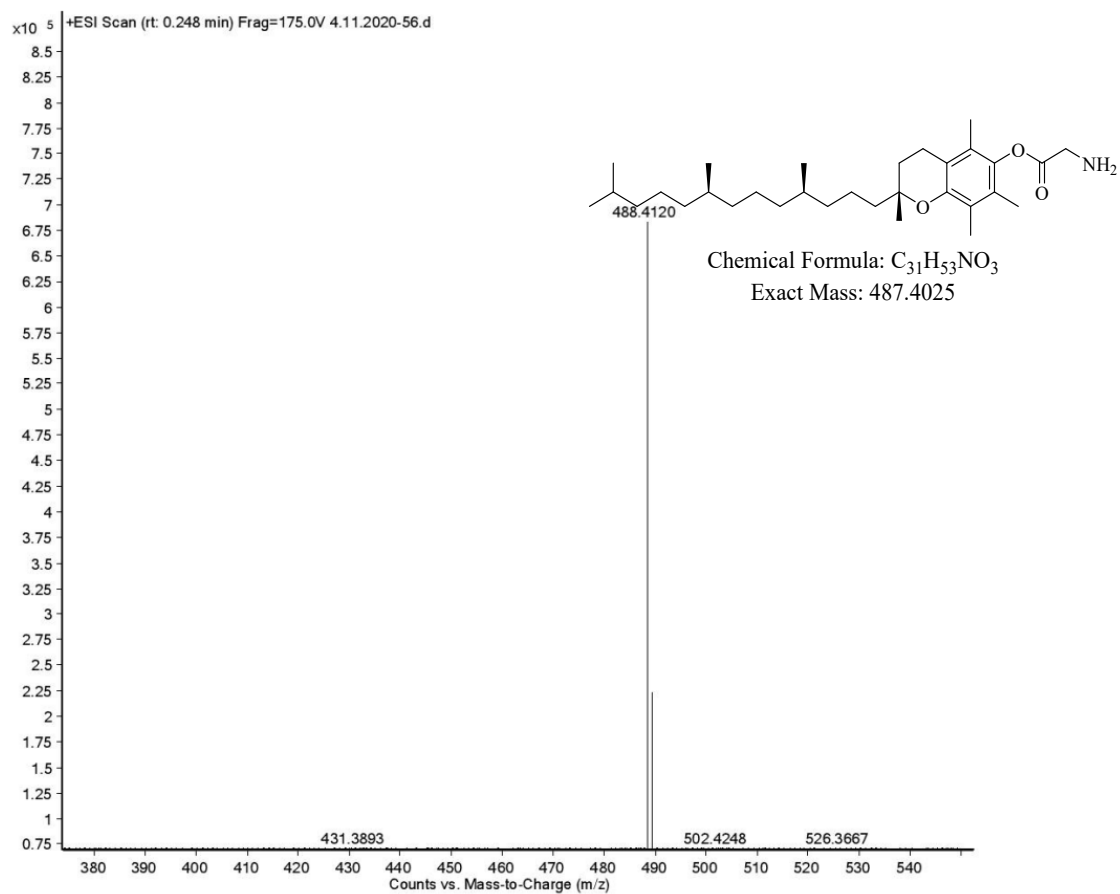

**Figure S6:** ESI-HRMS Spectrum of intermediate **2A**, Scheme A

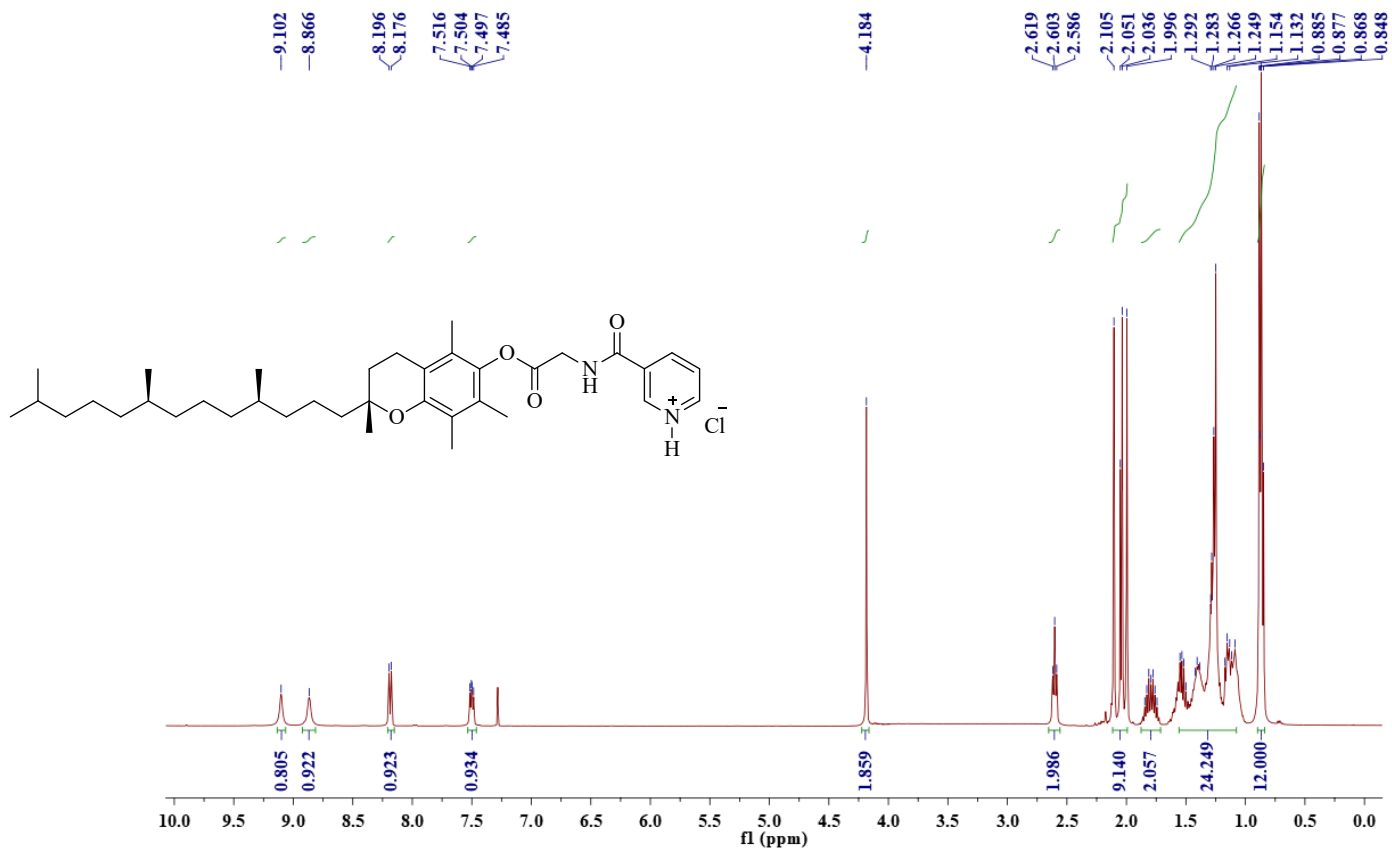

Figure S7: <sup>1</sup>H NMR Spectrum of NGT (Lp-I), Scheme A



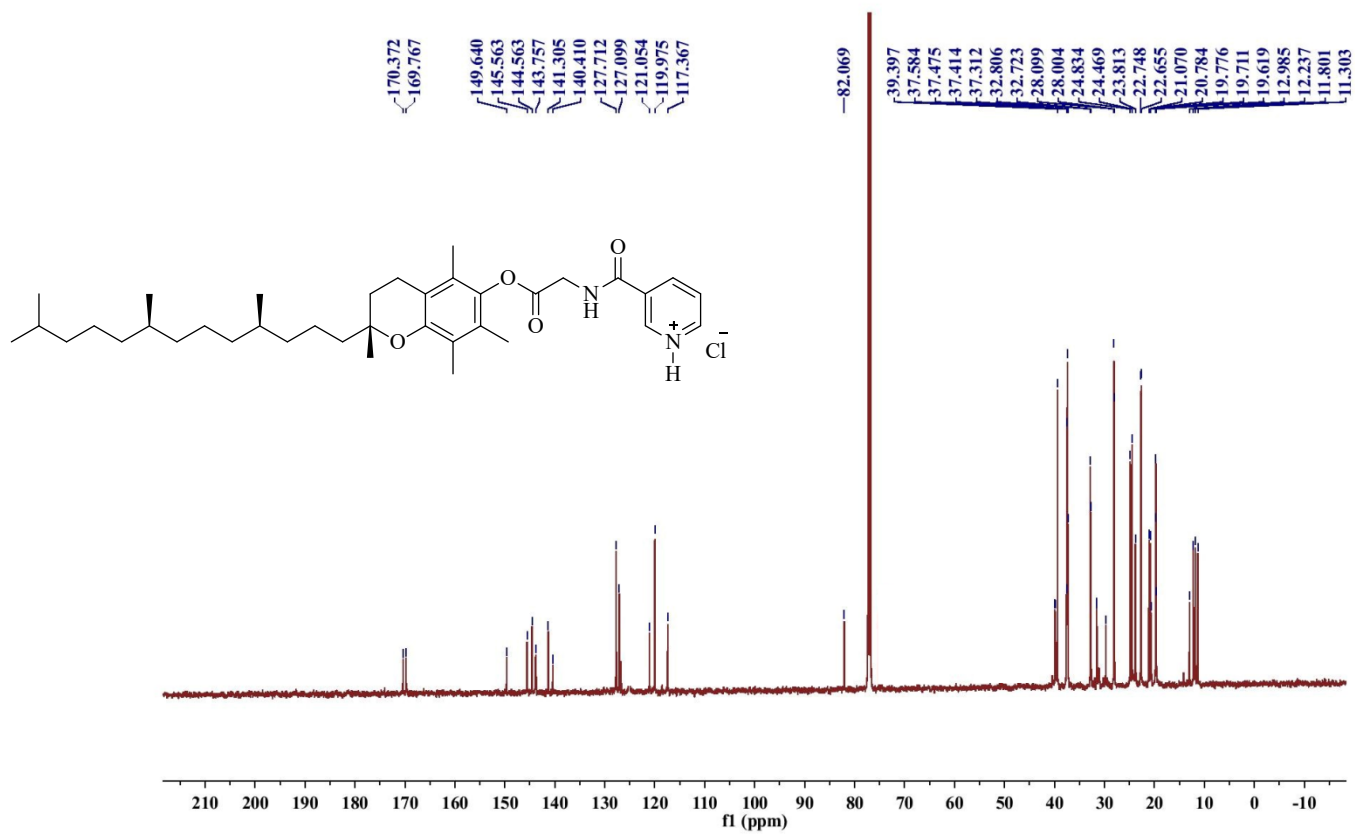

Figure S8: <sup>13</sup>C NMR Spectrum of NGT (Lp-I), Scheme A

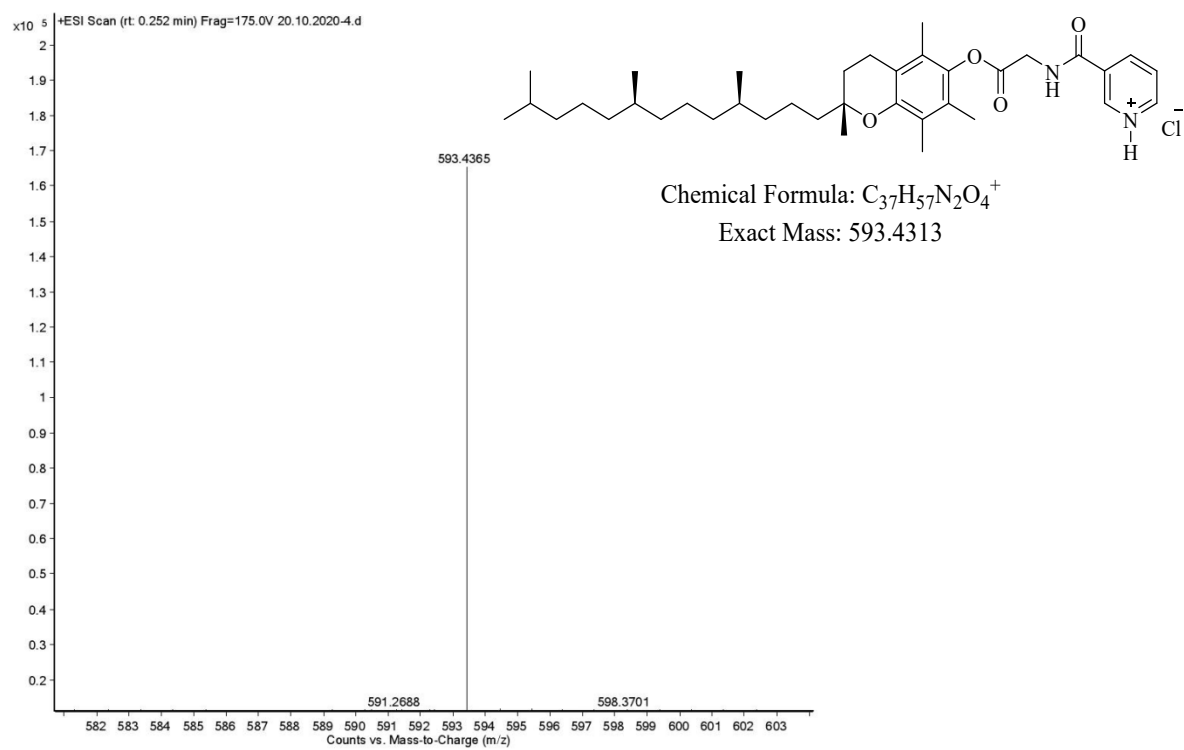

**Figure S9:** ESI-HRMS Spectrum of NGT (Lp-I), Scheme A

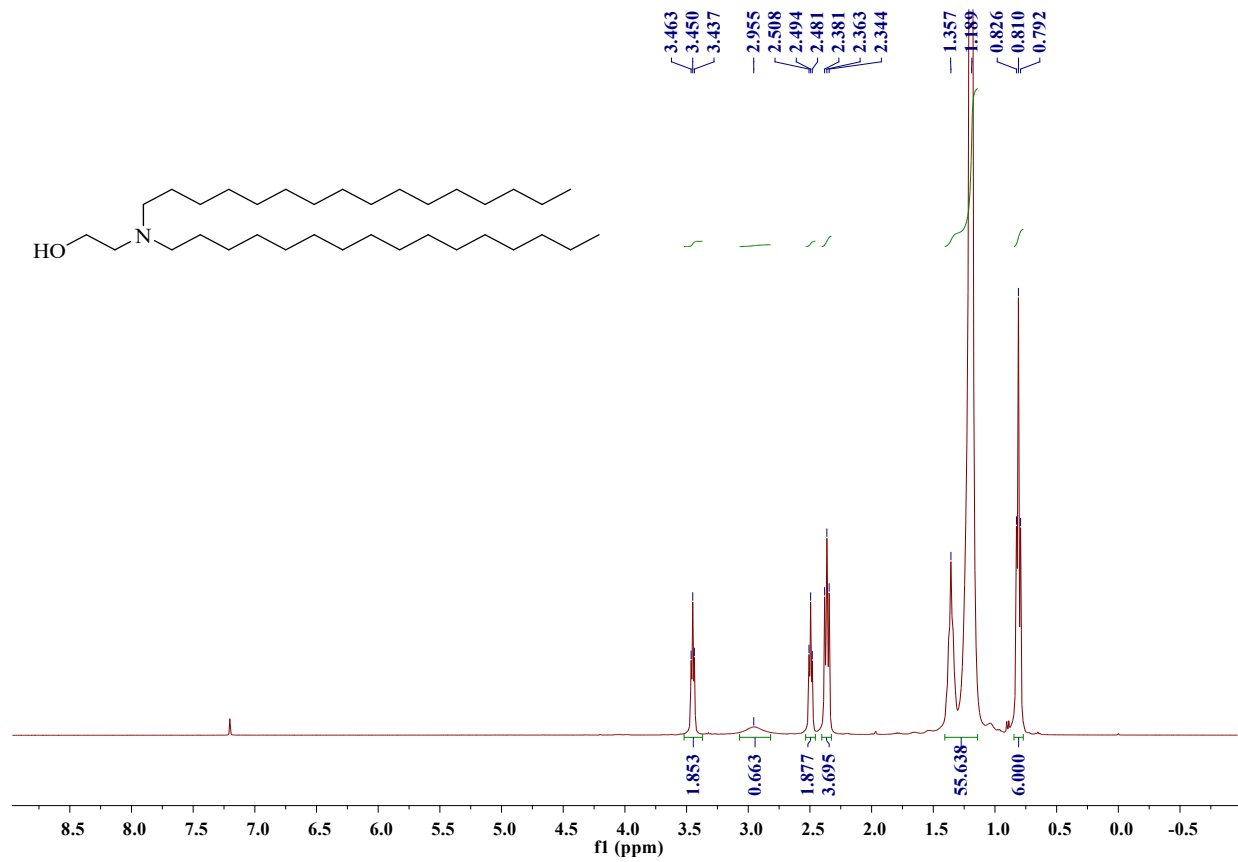

**Figure S10:** <sup>1</sup>H NMR Spectrum of compound 1B, Scheme B

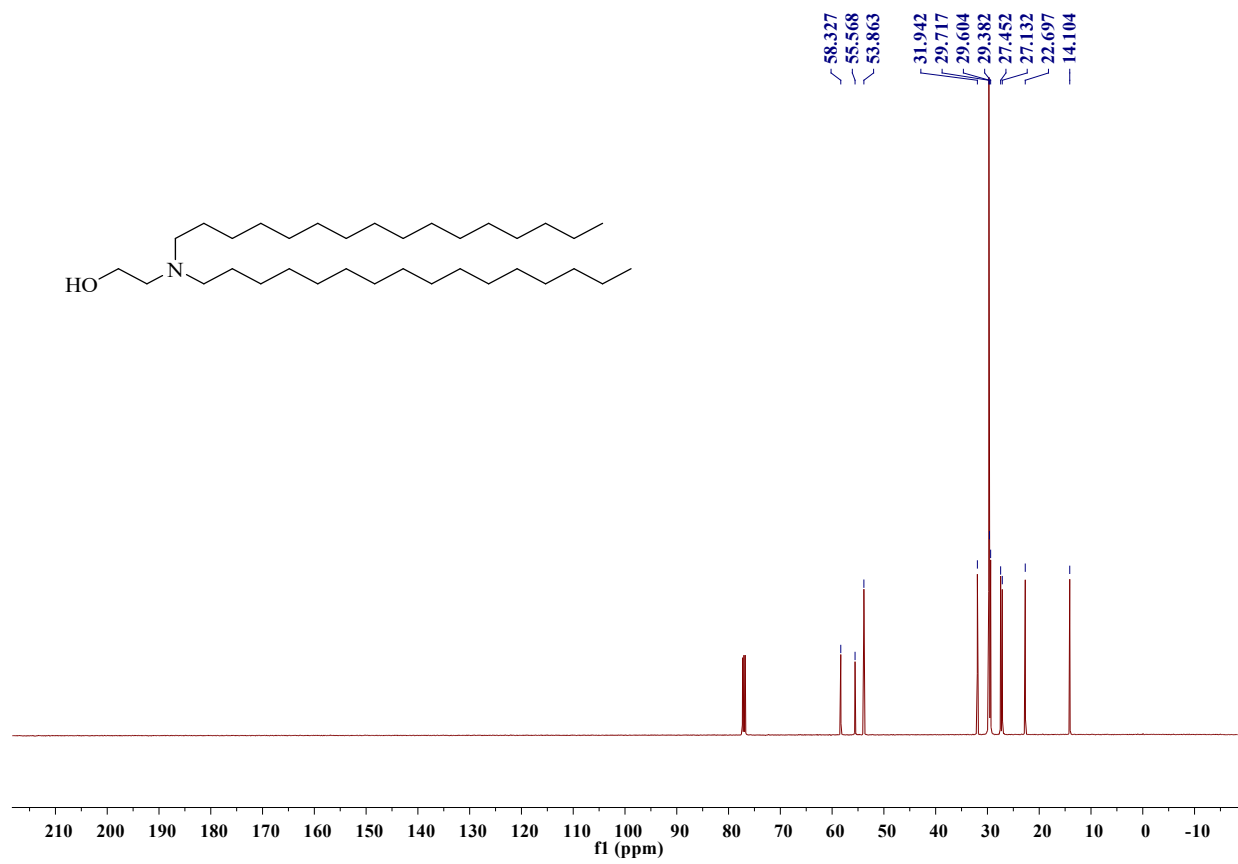

**Figure S11:** <sup>13</sup>C NMR Spectrum of compound 1B, Scheme B

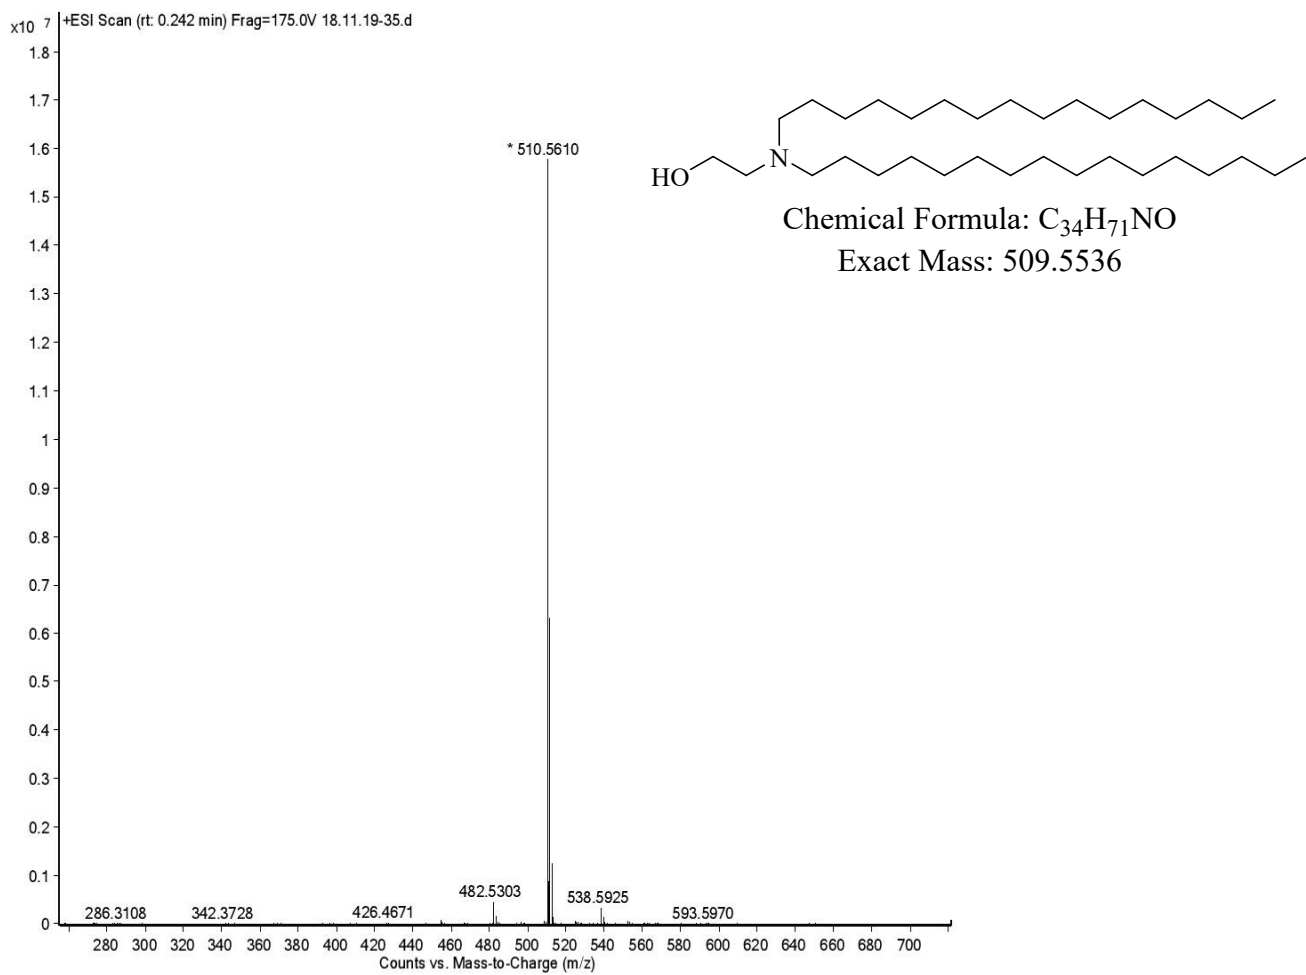

**Figure S12: ESI-HRMS Spectrum of compound 1B, Scheme B**

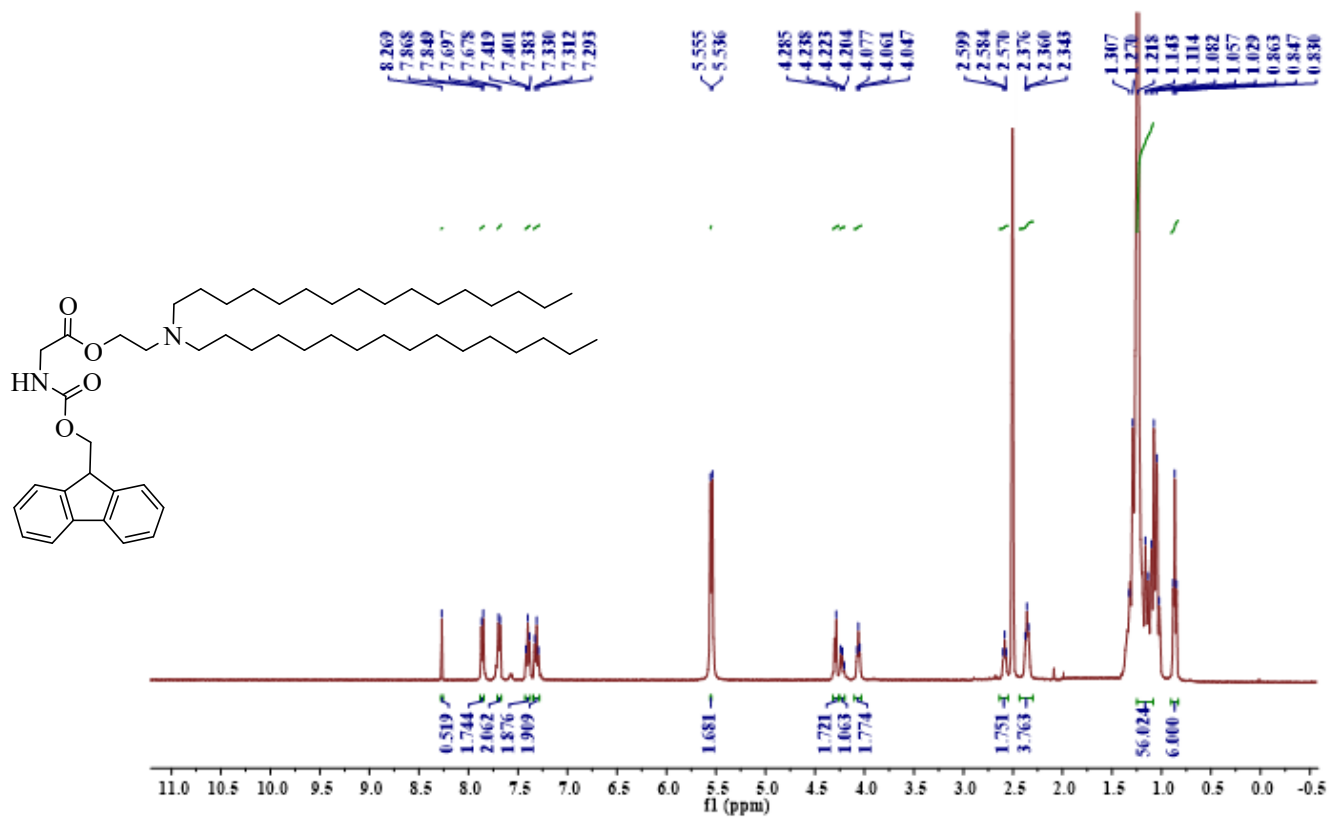

Figure S13: <sup>1</sup>H NMR Spectrum of intermediate 2B, Scheme B

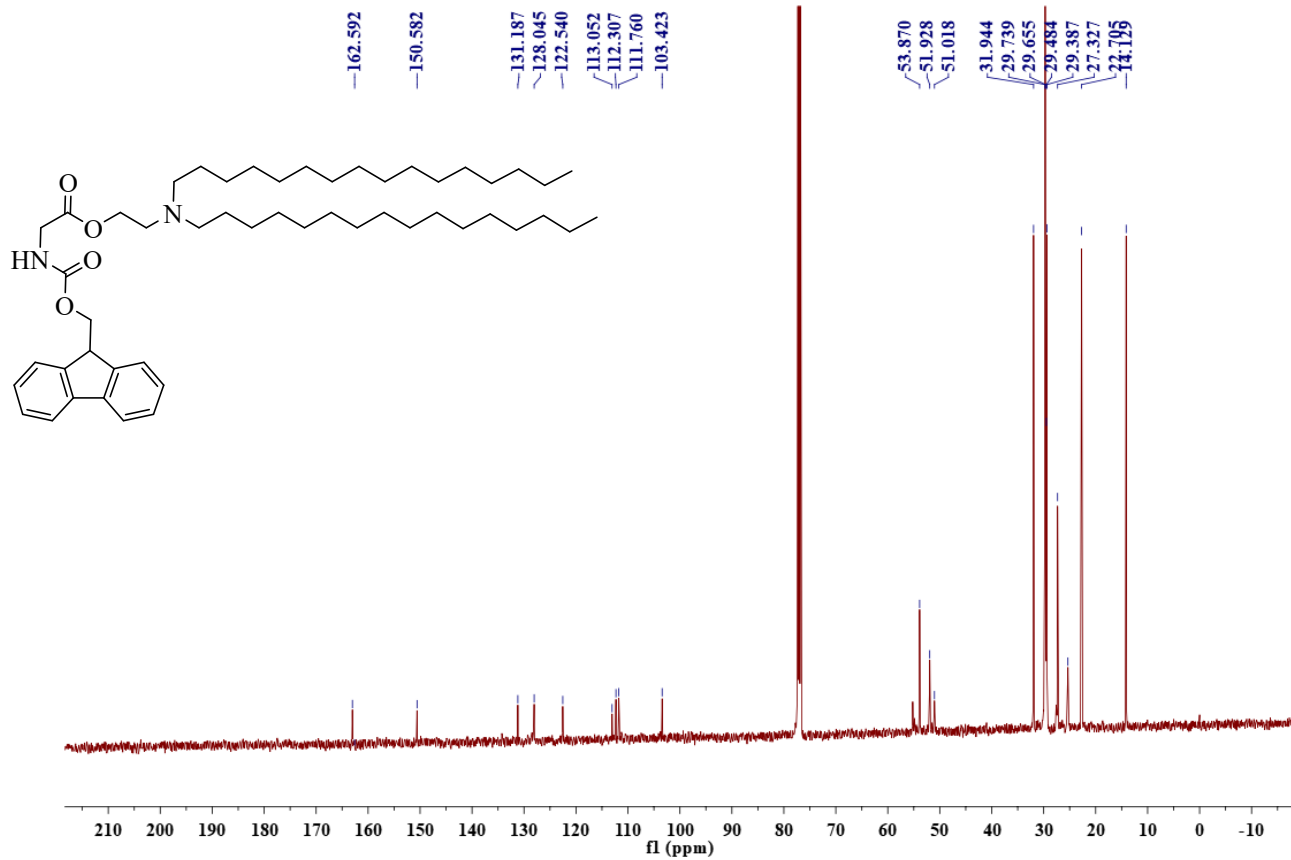

Figure S14: <sup>13</sup>C NMR Spectrum of intermediate 2B, Scheme B

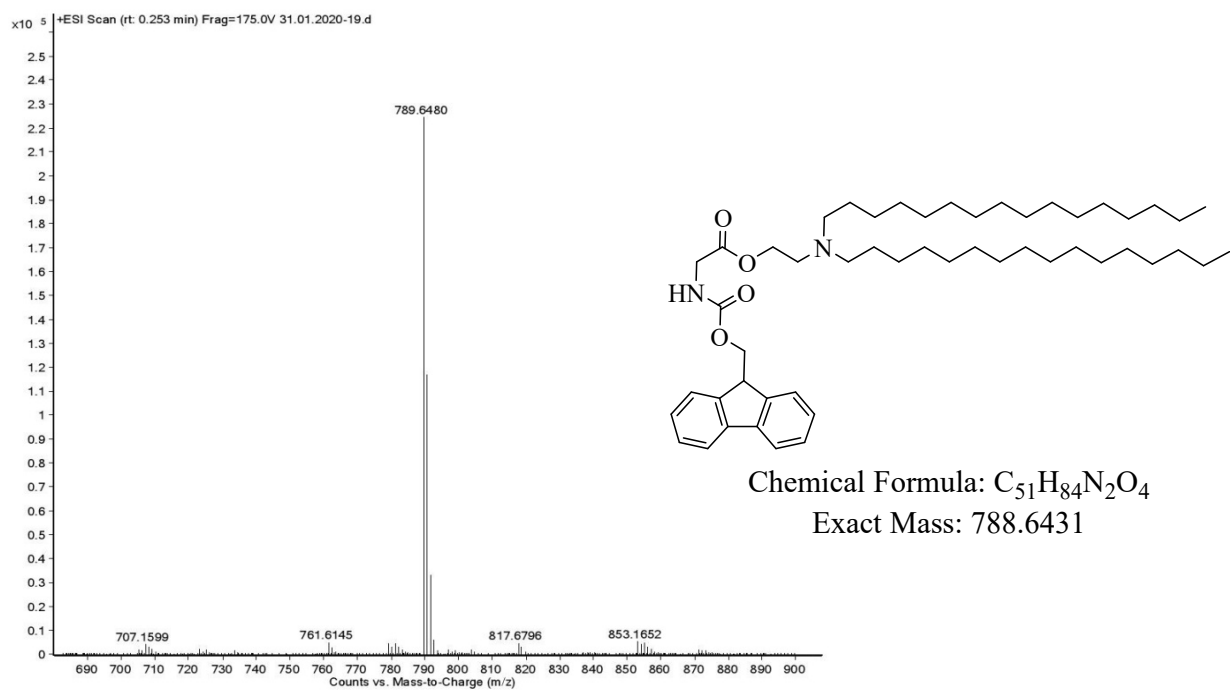

**Figure S15:** ESI-HRMS Spectrum of intermediate **2B**, Scheme B



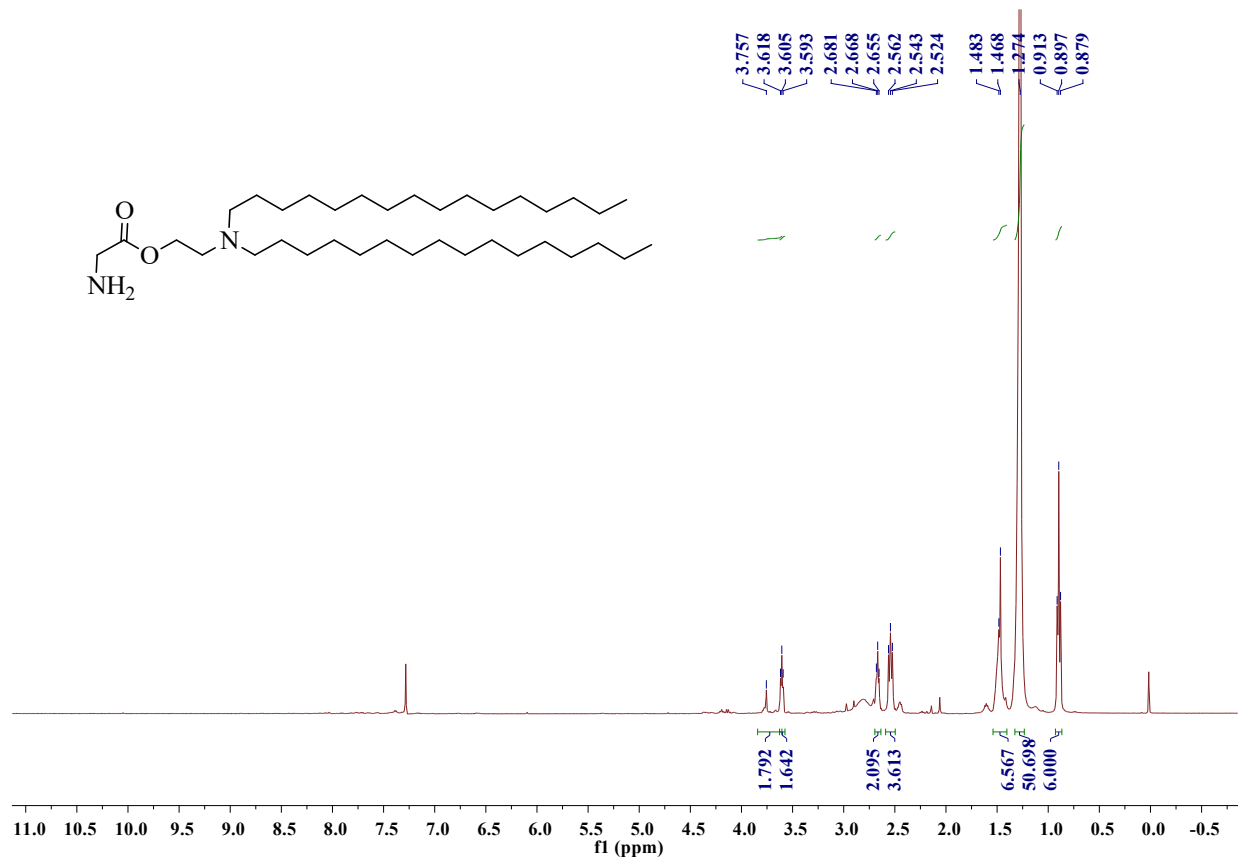

Figure S16: <sup>1</sup>H NMR Spectrum of intermediate 3B, Scheme B

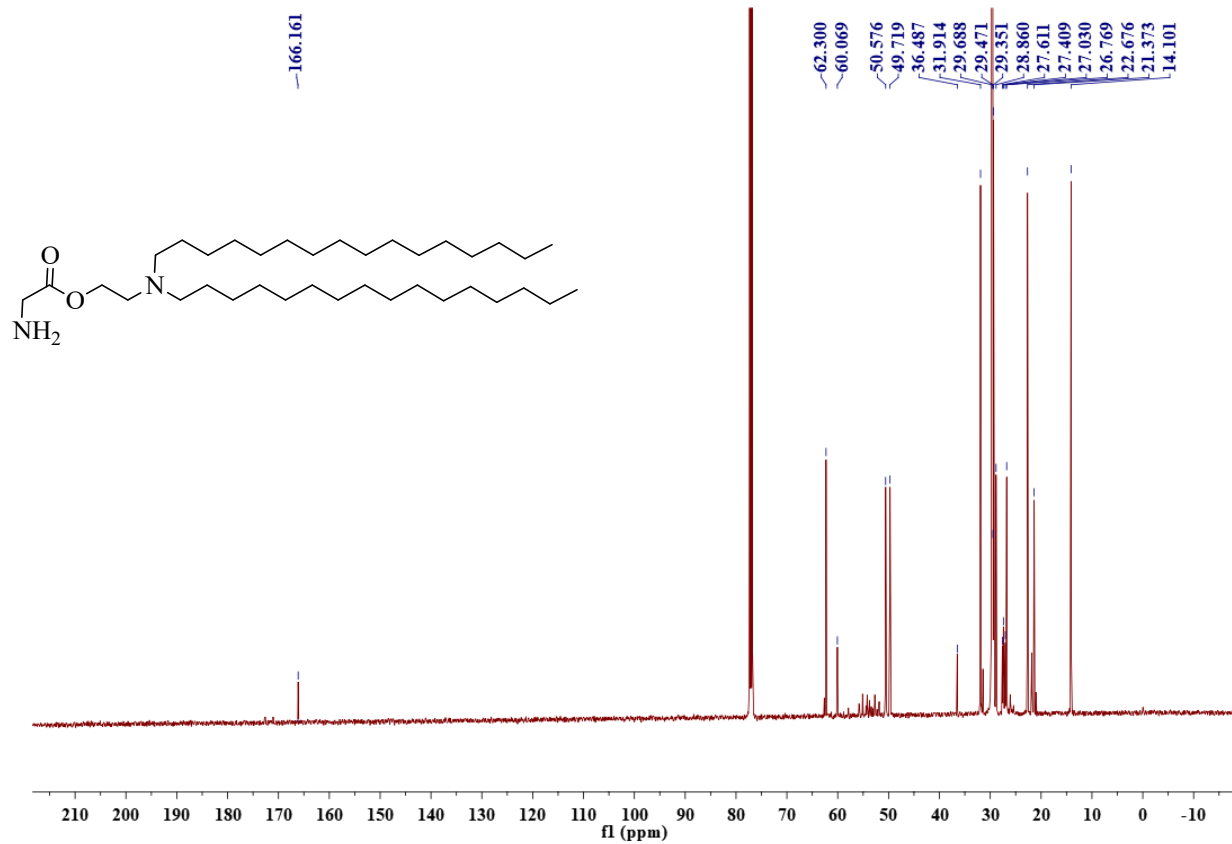

Figure S17: <sup>13</sup>C NMR Spectrum of intermediate 3B, Scheme B

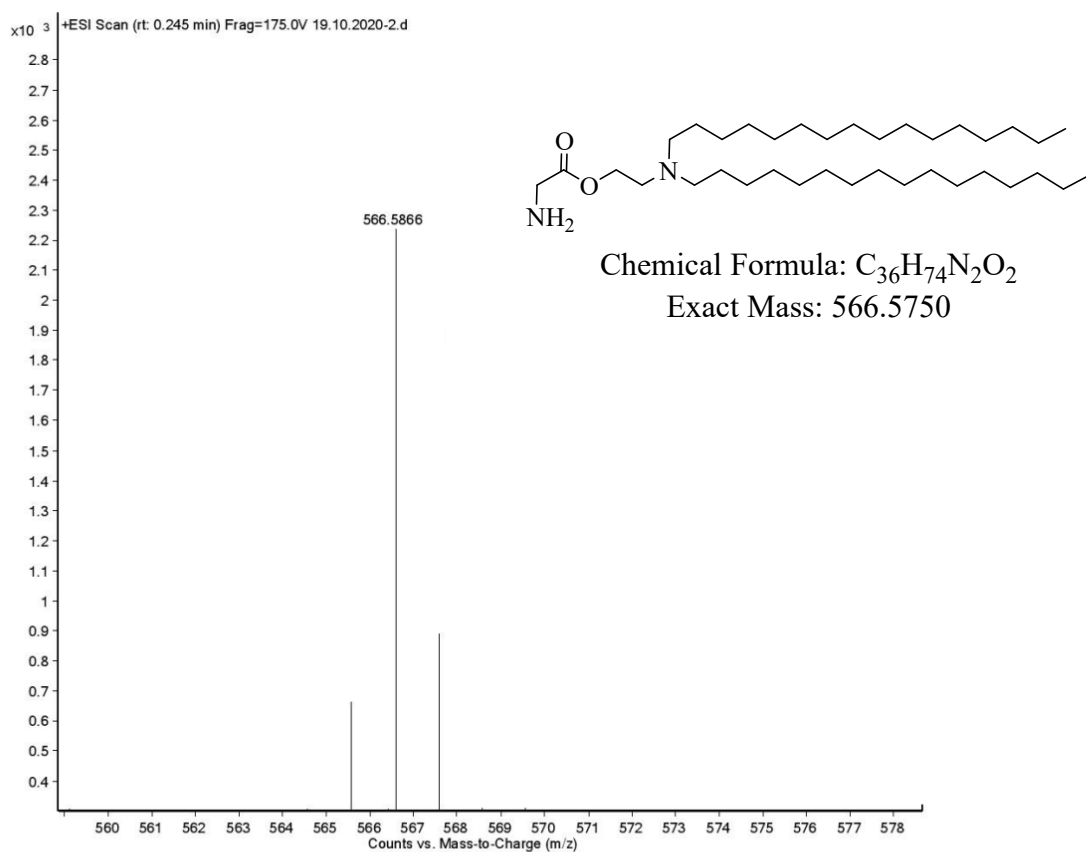

**Figure S18:** ESI-HRMS Spectrum of intermediate **3B**, Scheme B

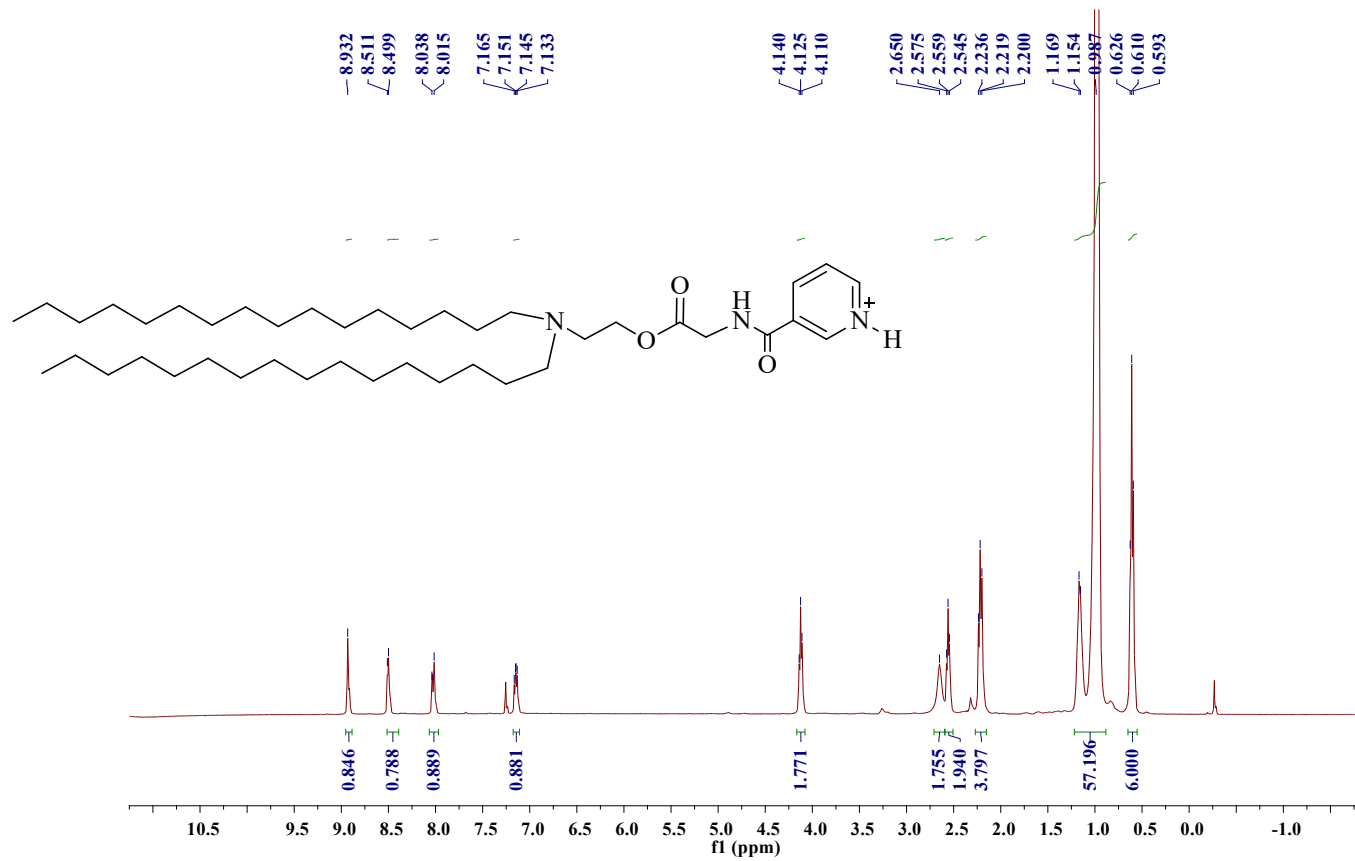

Figure S19: <sup>1</sup>H NMR Spectrum of NGC Lp-II, Scheme B

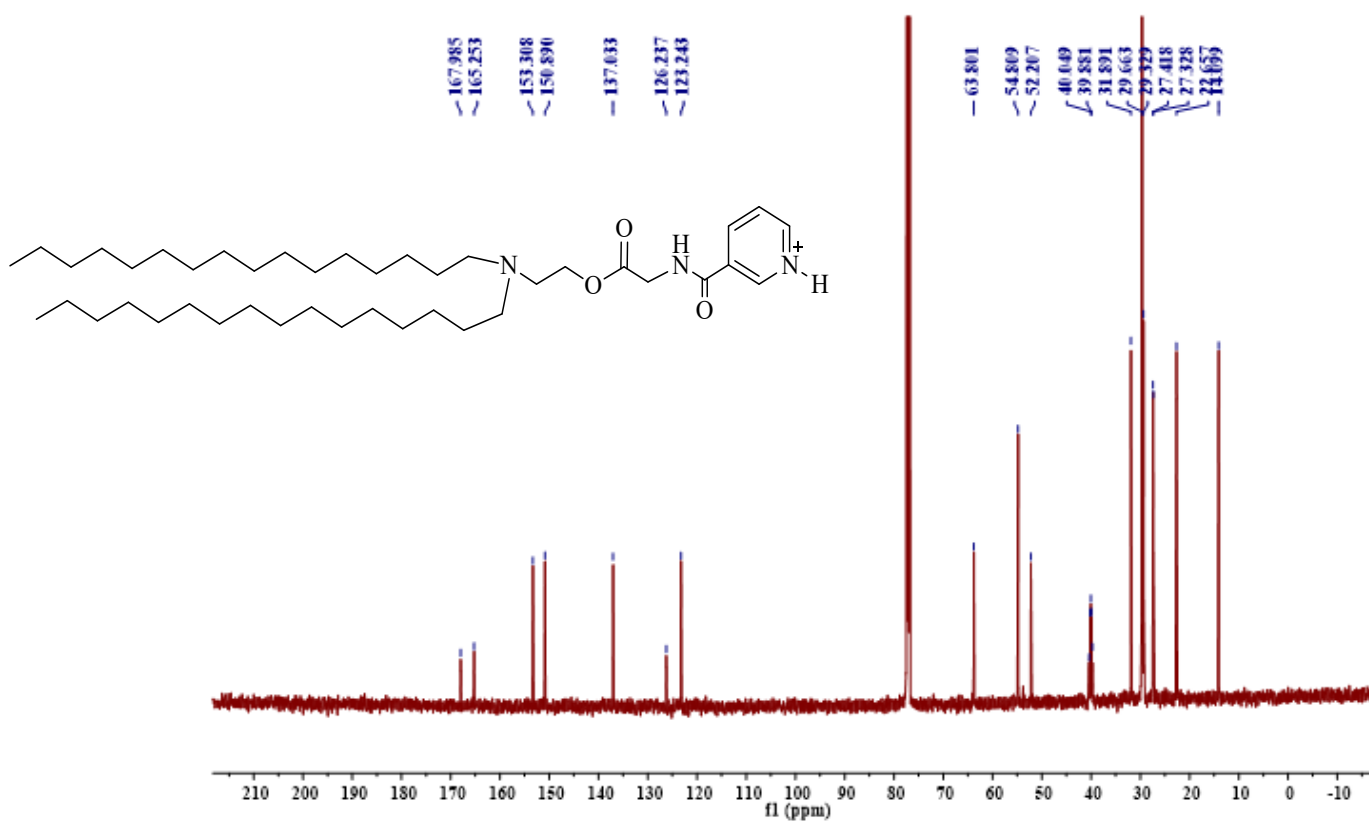

Figure S20: <sup>13</sup>C NMR Spectrum of NGC Lp-II, Scheme B

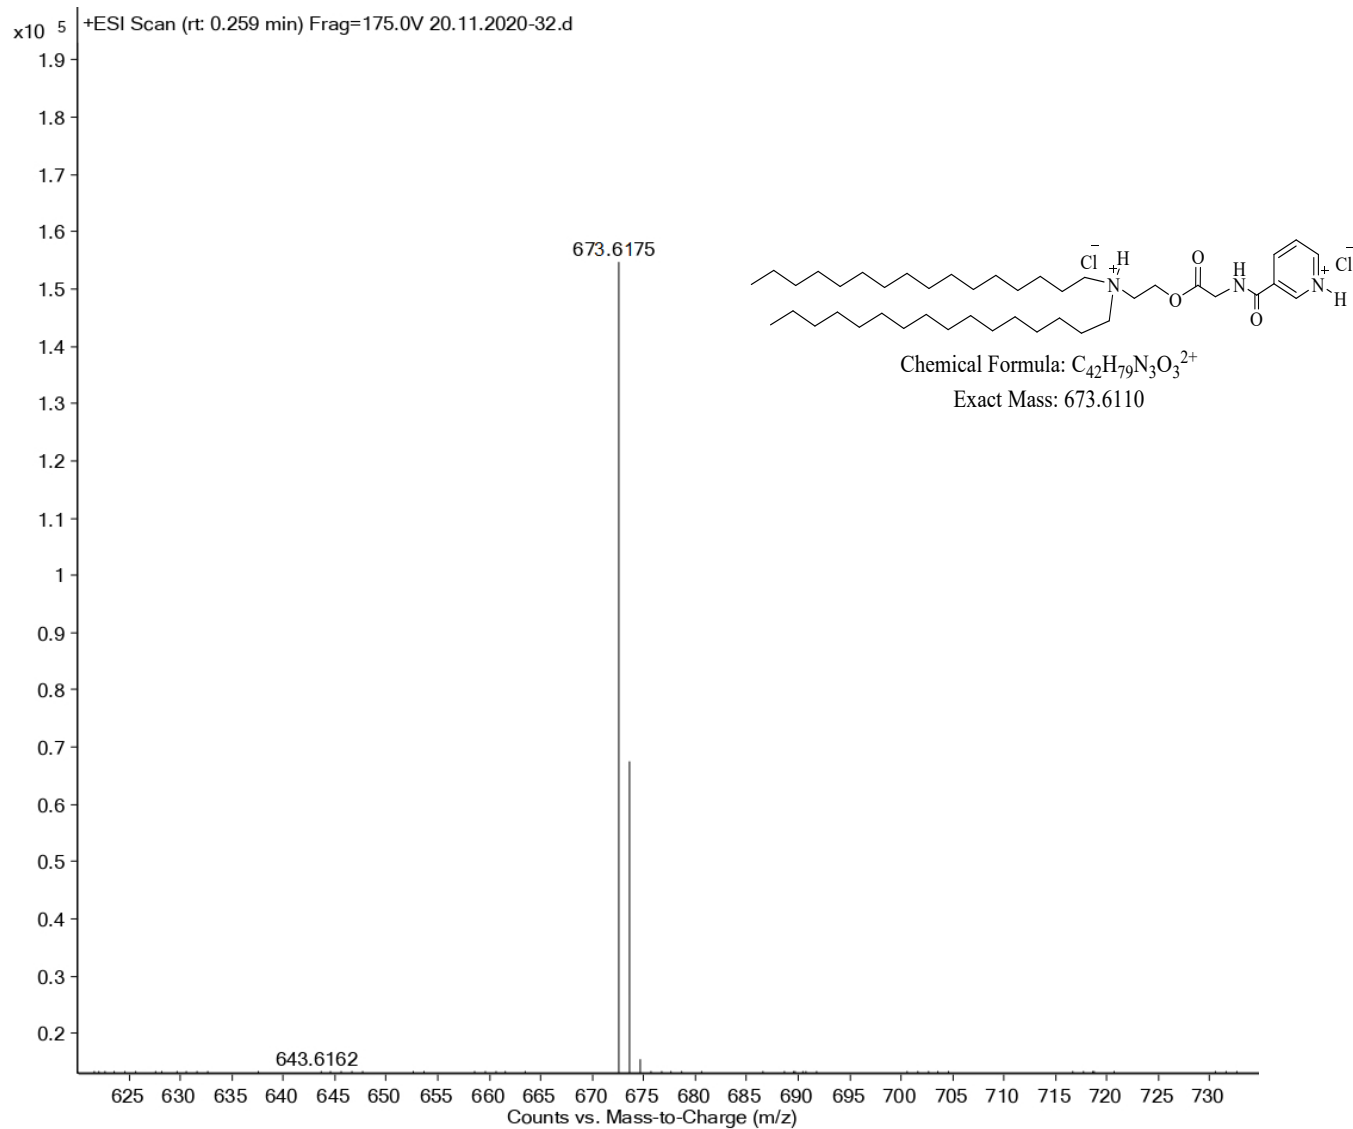

**Figure S21: ESI-HRMS Spectrum of NGC Lp-II, Scheme B**

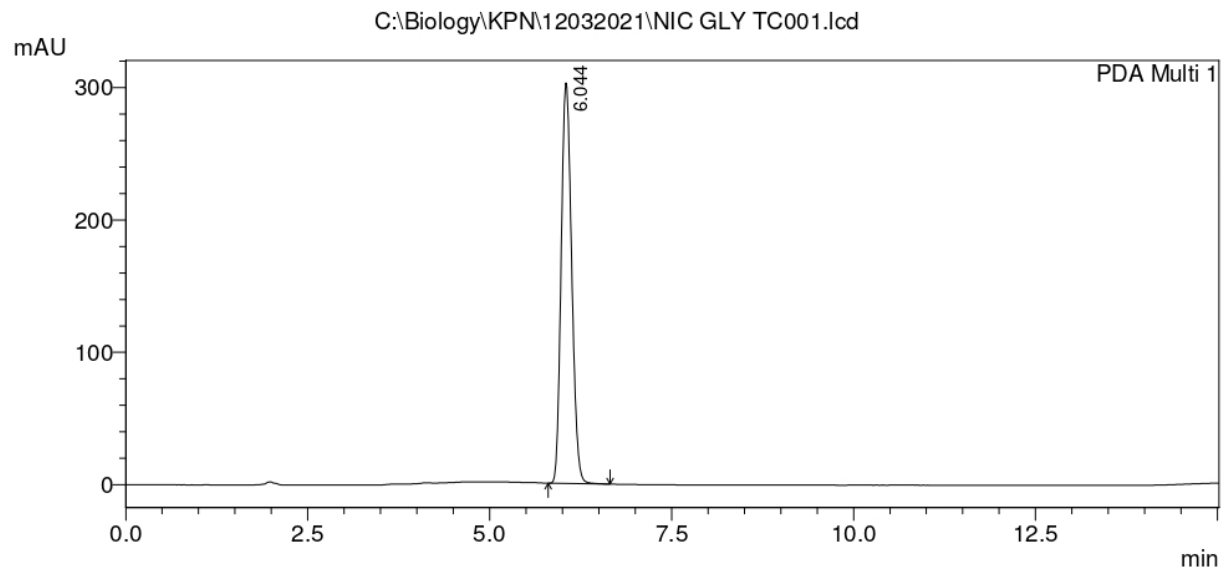

**Figure S22: HPLC Chromatogram of NGT Lp-I**

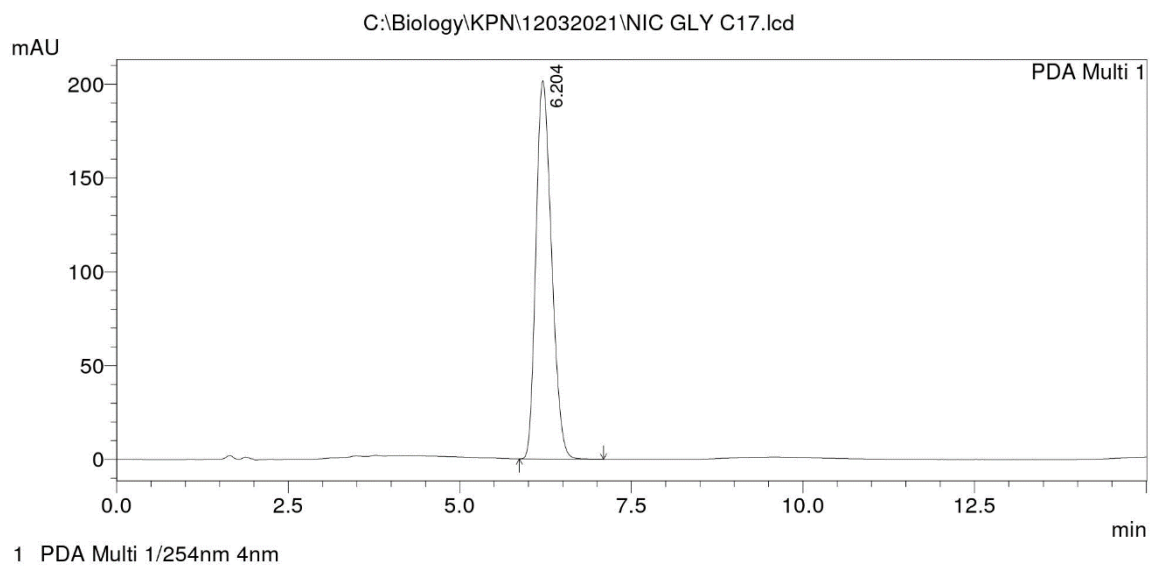

**Figure S23: HPLC Chromatogram of NGC Lp-II**

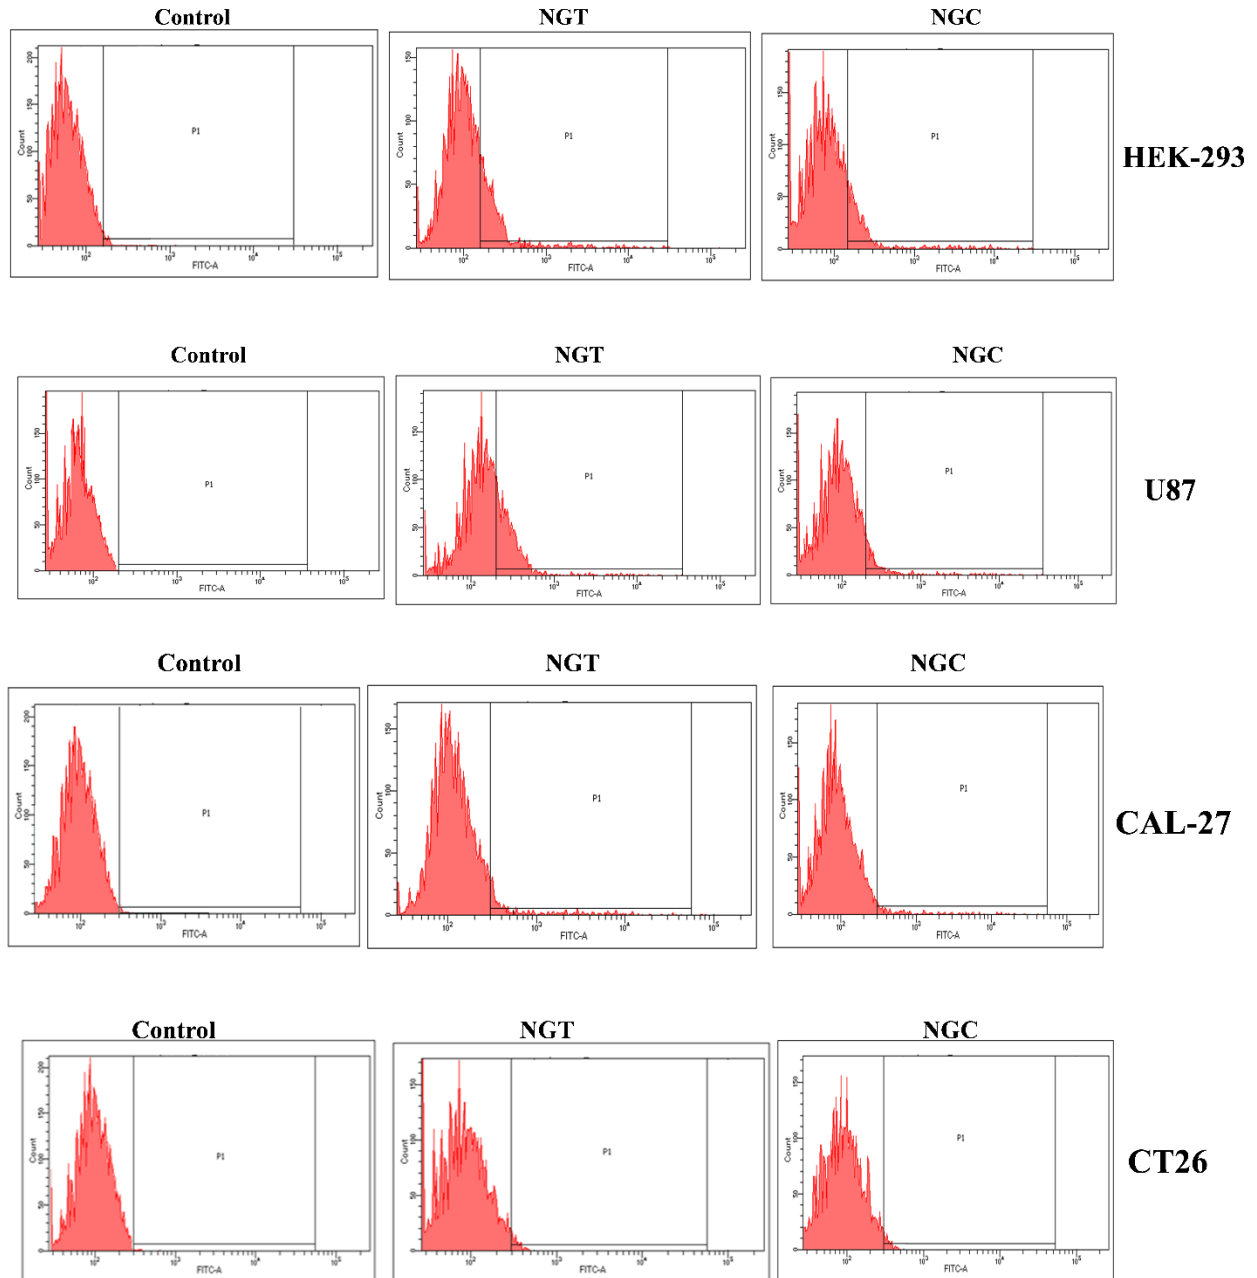

**Figure S24:** FACS analysis of eGFP transfection of NGT and NGC at 2:1 mole ratio in HEK-293, U87, CAL-27, and CT-26 cell lines; Non treated as control.
